# Supplementary material
Source: Research Square preprint supplement (doi:10.21203/rs.3.rs-9453308/v1)
Supplement: Supplementary file 1 [file 055ce12a9167d33cf8af52b0.docx]

**SUPPLEMENTARY TABLE**

**Supplementary Table 1: Quality Assessment of Cross-sectional Studies using the JBI Checklist**

| **S/N** | **Articles** | **JBI Quality Assessment** | | | | | | | |
| --- | --- | --- | --- | --- | --- | --- | --- | --- | --- |
| **1** | **2** | **3** | **4** | **5** | **6** | **7** | **8** |
| 1 | Gray et al (2011) | Y | Y | Y | Y | U | U | Y | Y |
| 2 | Miranda et al (2011) | Y | Y | Y | Y | Y | U | Y | Y |
| 3 | Renzaho et al (2011) | Y | Y | Y | Y | U | U | Y | Y |
| 4 | Abouzeid et al (2013) | Y | Y | Y | Y | U | U | Y | Y |
| 5 | Jowitt et al (2014) | Y | Y | Y | Y | U | U | Y | Y |
| 6 | Dhillon et al (2016) | Y | Y | Y | Y | Y | Y | Y | Y |
| 7 | Meeks et al (2017) | Y | Y | Y | Y | U | U | Y | Y |
| 8 | Boateng et al (2018) | U | Y | Y | Y | U | U | Y | Y |
| 9 | Danquah et al (2018) | Y | Y | Y | Y | Y | Y | Y | Y |
| 10 | Skogberg et al (2018) | Y | Y | Y | Y | U | U | Y | Y |
| 11 | Pettersson et al (2018) | Y | Y | Y | Y | U | U | Y | Y |
| 12 | Boateng et al (2019) | Y | Y | Y | Y | Y | Y | Y | Y |
| 13 | Danquah et al (2019) | Y | Y | Y | Y | Y | Y | Y | Y |
| 14 | Skogberg et al (2019) | Y | Y | Y | Y | Y | Y | Y | Y |
| 15 | van der Linden et al (2019) | Y | Y | Y | Y | U | U | Y | Y |
| 16 | Fiorini et al (2020) | Y | Y | Y | Y | U | U | Y | Y |
| 17 | Abdiha et al (2024) | Y | Y | Y | Y | U | U | Y | Y |

**Key**: Y = Yes, N = No. U = Unclear. 1 = Were the criteria for inclusion in the sample clearly defined? 2 = Were the study subjects and the setting described in detail? 3 = Was the exposure measured in a valid and reliable way? 4 = Were objective, standard criteria used for measurement of the condition? 5 = Were confounding factors identified? 6 = Were strategies to deal with confounding factors stated? 7 = Were the outcomes measured in a valid and reliable way? 8 = Was appropriate statistical analysis used?

**Supplementary Table 2: Quality Assessment of Cohort Studies using the JBI Checklist**

| **S/N** | **Articles** | **JBI Quality Assessment** | | | | | | | | | | |
| --- | --- | --- | --- | --- | --- | --- | --- | --- | --- | --- | --- | --- |
| **1** | **2** | **3** | **4** | **5** | **6** | **7** | **8** | **9** | **10** | **11** |
| 1 | Tillin et al (2013) | Y | Y | Y | U | U | Y | Y | Y | Y | N | Y |
| 2 | Chambre et al (2017) | Y | Y | Y | Y | U | Y | Y | Y | Y | N | Y |
| 3 | Chilunga et al (2019) | Y | Y | Y | U | U | Y | Y | U | U | U | Y |
| 4 | Gujral et al (2021) | Y | Y | Y | Y | Y | Y | Y | Y | Y | N | Y |
| 5 | Modesti et al (2021) | Y | Y | Y | U | U | Y | Y | U | U | U | Y |
| 6 | Farmaki et al (2022) | Y | Y | Y | U | U | Y | Y | Y | Y | N | Y |

**Key**: Y = Yes, N = No. U = Unclear. JBI checklist for cohort studies was used for this assessment. 1 = Were the two groups similar and recruited from the same population? 2 = Were the exposures measured similarly to assign people to both exposed and unexposed groups? 3 = Was the exposure measured in a valid and reliable way? 4 = Were confounding factors identified? 5 = Were strategies to deal with confounding factors stated? 6 = Were the groups/participants free of the outcome at the start of the study (or at the moment of exposure)? 7 = Were the outcomes measured in a valid and reliable way? 8 = Was the follow up time reported sufficient to be long enough for outcomes to occur? 9 = Was follow up complete, and if not, were the reasons to loss to follow up described and explored? 10 = Were strategies to address incomplete follow up utilized? 11 = Was appropriate statistical analysis used?

**Supplementary Quality Assessment of Case Control and Qualitative Studies using the JBI Checklist**

|  | **Articles** | **JBI Quality Assessment** | | | | | | | | | |
| --- | --- | --- | --- | --- | --- | --- | --- | --- | --- | --- | --- |
| **1** | **2** | **3** | **4** | **5** | **6** | **7** | **8** | **9** | **10** |
| A | Darko et al (2015) | Y | Y | Y | Y | Y | U | U | Y | Y | Y |
| B | De-Graft Aikins et al (2019) | Y | Y | Y | Y | Y | N | U | Y | Y | Y |

**Key**: Y = Yes, N = No. U = Unclear. A = Case Control, B = Qualitative.

For Case Control, 1 = Were the groups comparable other than the presence of disease in cases or the absence of disease in controls? 2 = Were cases and controls matched appropriately? 3 = Were the same criteria used for identification of cases and controls? 4 = Was exposure measured in a standard, valid and reliable way? 5 = Was exposure measured in the same way for cases and controls? 6 = Were confounding factors identified? 7 = Were strategies to deal with confounding factors stated? 8 = Were outcomes assessed in a standard, valid and reliable way for cases and controls? 9 = Was the exposure period of interest long enough to be meaningful? 10 = Was appropriate statistical analysis used?

For qualitative study, 1 = Is there congruity between the stated philosophical perspective and the research methodology? 2 = Is there congruity between the research methodology and the research question or objectives? 3 = Is there congruity between the research methodology and the methods used to collect data? 4 = Is there congruity between the research methodology and the representation and analysis of data? 5 = Is there congruity between the research methodology and the interpretation of results? 6 = Is there a statement locating the researcher culturally or theoretically? 7 = Is the influence of the researcher on the research, and vice- versa, addressed? 8 = Are participants, and their voices, adequately represented? 9 = Is the research ethical according to current criteria or, for recent studies, and is there evidence of ethical approval by an appropriate body? 10 = Do the conclusions drawn in the research report flow from the analysis, or interpretation, of the data?
